# Supplementary material for: Age-dependent changes in the transverse carpal ligament and median nerve: a cadaveric histological and biomechanical study
Source: PeerJ. 2026 Feb 24;14:e20878. doi: 10.7717/peerj.20878 (PMC12947759; doi:10.7717/peerj.20878)
Supplement: Supplemental Information 1 [file peerj-14-20878-s001.xlsx]

## Sheet: Dynamic stiffness
Age	Proximal	Middle	Distal	Average
40	1427.33	1585.33	1502.33	1505
48	1626	1782	1618	1675.33
51	1300	1410.67	1651.67	1454.11
51	1363	1716	1199	1426
53	1192.67	1288.33	1897.33	1459.44
56	1894	1650.33	1262.33	1602.22
59	1331.67	1626.33	1693.33	1550.44
60	1839.33	1743.33	1290	1624.22
61	1880.67	1940.33	1622.33	1814.44
61	1098.67	1580	1240.67	1306.44
61	1917	1492.67	1894.67	1768.11
63	1443.67	1838.67	1308.67	1530.33
66	1767.33	1764	1663.67	1731.67
66	979.67	1348	1652.67	1326.78
68	1623.33	1409.67	1677.33	1570.11
68	1224	1954	1957	1711.67
69	1025.67	963.33	1100	1029.67
69	1935.33	1729.67	1567	1744
71	1248	1397.67	1691.67	1445.78
71	1363.67	1651	1473.33	1496
73	1428.67	1781.33	1657	1622.33
73	1428.67	1618.33	1450.67	1499.22
73	1288.67	1128.67	1447.33	1288.22
74	1040	1075.33	1303	1139.44
75	1211.67	1426	1243	1293.56
75	1010.67	1800	1766.33	1525.67
76	1879.67	2826	2876.33	2527.33
78	2879.33	2908	2953	2913.44
78	1863.33	1861.33	1866.67	1863.78
78	1849.33	2809.33	1785.67	2148.11
78	2944.67	2900.67	2775.67	2873.67
79	2669.33	2960.67	2912	2847.33
79	2762.33	2967.33	2939.33	2889.67
80	2960.33	2889.67	2927.67	2925.89
82	2741.33	2939.67	1951.67	2544.22
82	2902	2938	2923	2921
82	2885.67	2849	2919.67	2884.78
83	2764.33	2875	2802	2813.78
84	2739.67	2891.33	2897	2842.67
84	2936.33	2746.33	2965.67	2882.78
84	2891	2832.67	2881	2868.22
84	2911.67	2919.33	2884.67	2905.22
86	2629.33	2914.67	2747.33	2763.78
86	2413.33	2836.33	1722.67	2324.11
88	2921	2943	2645.33	2836.44
89	2913	2864	2896	2891
90	2946	2957	2942	2948.33
92	2974	2936.33	2764	2891.44
92	2910.33	2908	2931.33	2916.56
93	2873.67	2908.67	2964.33	2915.56
40	1388.67	1784.33	1505	1559.33
48	1601	1418	1419	1479.33
51	1201.33	1358.33	1186	1248.56
51	1488.67	1810	1328	1542.22
53	1049.33	1324.67	1786.67	1386.89
56	1608	1740.33	1736.67	1695
59	1156	1749.67	1907.33	1604.33
60	1125.67	1337	1560.67	1341.11
61	1481.33	1531.67	1380	1464.33
61	1769.33	1858.33	1440.67	1689.44
61	2758	2902.67	2886.67	2849.11
63	1814.33	1677.33	1174	1555.22
66	2978.67	2926.67	2897	2934.11
66	1703	1463	1318.33	1494.78
68	1737.67	1045.67	1758.33	1513.89
68	1450.67	1718.67	1441.33	1536.89
69	1542.67	1268.67	1482.33	1431.22
69	970.33	1287.67	953.67	1070.56
71	1140.67	1362.33	1462.67	1321.89
71	1506.67	1428	1688.33	1541
73	1390.67	1653.67	1749	1597.78
73	1868.33	1789.33	1633	1763.56
73	1135.33	1041.33	1111	1095.89
74	1126.33	1686	1637.33	1483.22
75	1675.33	1326.33	1801.33	1601
75	1140.33	1685	1436.67	1420.67
76	2945.67	2963.33	2950.67	2953.22
78	2889.33	2710	2712.33	2770.56
78	2843	2913.33	2853.33	2869.89
78	1358.67	1278	1535.67	1390.78
78	2918.33	2935	2852.33	2901.89
79	1652.33	1455.67	1510	1539.33
79	2888.67	2846.67	2712	2815.78
80	2925	2902.33	2883.67	2903.67
82	2916.67	2824.67	2682	2807.78
82	2882	2540.33	2744.33	2722.22
82	2907	2851.33	2706.33	2821.56
83	2829.33	2949.33	2940.67	2906.44
84	2801.33	2944	2773.33	2839.56
84	2831	2923	1852.33	2535.44
84	2701.67	2931	2864	2832.22
84	2887	2914.67	2984.33	2928.67
86	2608.67	2764	2799.33	2724
86	2943.67	2838.33	2368.33	2716.78
88	2942.67	2855	2773	2856.89
89	2947	2779	2890.33	2872.11
90	2816.67	2926.33	2788	2843.67
92	2852	2705.33	2872.67	2810
92	2928.67	2859.67	2866.67	2885
93	1454	1415	1481.33	1450.11

## Sheet: Logarithmic decrement
Age	Proximal	Middle	Distal	Average
40	2.93	2	1.72	2.22
48	1.66	1.76	2.08	1.83
51	1.43	1.42	1.56	1.47
51	1.96	1.57	1.37	1.63
53	1.09	1.8	1.7	1.53
56	1.72	1.72	1.59	1.68
59	2.2	2.09	2.37	2.22
60	1.96	1.81	1.84	1.87
61	1.86	1.7	1.68	1.74
61	1.33	1.6	1.39	1.44
61	2.53	2.34	1.97	2.28
63	1.59	1.72	1.39	1.57
66	1.81	2.06	1.74	1.87
66	0.84	1.27	1.46	1.19
68	1.71	1.85	1.85	1.8
68	1.65	1.68	1.7	1.68
69	1.71	1.36	1.28	1.45
69	1.57	1.66	1.7	1.64
71	1.45	1.55	1.69	1.56
71	2.29	1.82	1.82	1.98
73	1.64	1.85	1.71	1.73
73	1.76	1.82	1.72	1.77
73	1.39	1.14	1.36	1.3
74	1.14	0.65	1.06	0.95
75	2.08	2.33	2.69	2.37
75	1.67	2.34	1.87	1.96
76	1.52	1.75	1.56	1.61
78	1.96	1.7	2.07	1.91
78	1.53	1.53	1.52	1.53
78	2.08	2.38	1.91	2.12
78	2.67	2.57	1.81	2.35
79	1.68	2.11	1.92	1.91
79	1.78	2.23	1.92	1.98
80	1.65	1.77	1.68	1.7
82	1.88	2.37	1.37	1.87
82	1.62	1.91	1.61	1.72
82	1.7	1.7	1.75	1.71
83	1.58	1.95	1.86	1.8
84	2.09	1.84	1.91	1.94
84	2.28	1.81	1.44	1.84
84	2.01	2.51	1.73	2.08
84	1.91	1.99	1.98	1.96
86	1.63	2.05	1.5	1.73
86	1.54	1.8	1.63	1.66
88	1.94	1.76	1.63	1.77
89	1.9	1.95	1.63	1.83
90	2.28	2.01	1.88	2.06
92	1.89	1.96	1.89	1.91
92	1.89	1.96	1.75	1.87
93	1.88	2.09	1.91	1.96
40	1.65	1.97	1.61	1.74
48	1.68	1.58	1.66	1.64
51	1.61	1.72	1.37	1.57
51	1.87	1.89	1.45	1.74
53	1.06	1.58	1.77	1.47
56	2.04	1.86	1.65	1.85
59	1.39	1.61	1.71	1.57
60	1.82	1.85	1.84	1.84
61	1.7	1.57	1.52	1.59
61	1.71	1.54	1.6	1.62
61	1.72	2.07	1.75	1.85
63	1.79	1.84	1.35	1.66
66	2.26	2.21	2.12	2.2
66	1.72	1.8	1.59	1.7
68	1.87	1.31	1.65	1.61
68	1.66	1.71	1.62	1.66
69	1.97	1.45	1.96	1.79
69	1.32	1.86	1.1	1.43
71	1.01	1.34	1.58	1.31
71	1.83	1.57	1.61	1.67
73	1.75	1.73	1.65	1.71
73	1.75	1.89	1.57	1.73
73	1.89	2.38	1.26	1.85
74	1.38	1.53	1.8	1.57
75	1.71	1.16	1.59	1.49
75	2.46	2.37	1.63	2.15
76	2.13	9.16	1.81	4.37
78	1.88	1.62	1.79	1.76
78	1.83	1.87	1.85	1.85
78	1.34	1.11	1.81	1.42
78	2.08	2.02	2.04	2.05
79	1.73	1.7	1.71	1.71
79	2.43	2.06	1.78	2.09
80	1.97	1.71	1.7	1.79
82	1.55	1.71	1.72	1.66
82	2.02	2.29	1.59	1.97
82	2.35	2	1.71	2.02
83	2.25	1.68	1.92	1.95
84	2.17	2.26	1.85	2.09
84	1.44	1.75	1.35	1.51
84	1.21	1.57	1.82	1.53
84	1.87	2.25	2.08	2.06
86	1.59	2.04	1.5	1.71
86	2.45	2.19	2.04	2.23
88	1.82	2.07	1.52	1.8
89	1.89	4.64	1.81	2.78
90	1.75	1.87	1.86	1.83
92	1.44	1.81	1.61	1.62
92	1.91	2.53	2.31	2.25
93	2.09	2.6	2.22	2.3

## Sheet: Relaxation time
Age	Proximal	Middle	Distal	Average
40	9	9.37	9.2	9.19
48	8.83	9.17	8.9	8.97
51	7.8	8.43	8.83	8.36
51	8.37	8.73	7.8	8.3
53	2.73	7.23	9.17	6.38
56	9.27	9.13	8.23	8.88
59	7.47	9.63	9.5	8.87
60	9.5	9.3	8.53	9.11
61	9.1	9.5	8.8	9.13
61	7.57	8.6	7.67	7.94
61	9.63	9.17	9.37	9.39
63	8.3	9.17	7.43	8.3
66	9.07	9.17	8.7	8.98
66	7.03	7.63	8.83	7.83
68	8.77	7.93	8.6	8.43
68	8.23	9.23	9.3	8.92
69	7.93	6.1	7.47	7.17
69	9.3	9.1	8.63	9.01
71	7.8	8.4	8.97	8.39
71	8.87	9.07	8.87	8.93
73	8.57	9.1	8.93	8.87
73	8.37	8.7	8.23	8.43
73	7.83	7.3	7.9	7.68
74	4.53	4.33	7.23	5.37
75	8.4	9.1	8.8	8.77
75	2.63	9.53	9.13	7.1
76	3.73	3.6	3.5	3.61
78	3.27	3.37	3	3.21
78	4	3.97	3.5	3.82
78	4.4	3.33	3.93	3.89
78	2.7	3	3.4	3.03
79	3.73	2.57	3.1	3.13
79	3.57	3.13	3.27	3.32
80	3.4	2.87	3.53	3.27
82	3.5	3.13	3.77	3.47
82	3.4	2.73	3.37	3.17
82	3.27	3.43	3.27	3.32
83	3.47	2.87	3.03	3.12
84	3.3	3.33	3.1	3.24
84	2.77	3.43	3.33	3.18
84	3.53	2.67	3.1	3.1
84	2.57	2.87	2.9	2.78
86	3.57	2.87	3.5	3.31
86	3.8	3.2	3.97	3.66
88	3.33	3	3.53	3.29
89	3.07	3.13	3.67	3.29
90	2.5	2.47	3.03	2.67
92	3.23	2.97	3.23	3.14
92	3.17	2.97	3.1	3.08
93	2.9	2.87	3.1	2.96
40	8.47	9.23	8.6	8.77
48	8.87	8.63	8.33	8.61
51	7.87	8.37	7.47	7.9
51	8.57	9.2	6.3	8.02
53	7.17	6.53	8.97	7.56
56	9	9.13	8.97	9.03
59	7.77	9	9.13	8.63
60	8.17	8.63	9.1	8.63
61	8.73	8.7	8.03	8.49
61	8.93	9.1	8.43	8.82
61	3.47	2.93	3.17	3.19
63	9.2	8.97	7.57	8.58
66	2.87	3.03	3.03	2.98
66	8.97	8.47	7.93	8.46
68	9.1	6.1	8.97	8.06
68	8.23	8.83	8.2	8.42
69	8.93	8.43	8.67	8.68
69	4.8	8.43	3.23	5.49
71	2.97	7.9	8.43	6.43
71	8.43	7.83	8.8	8.36
73	8.27	8.9	8.97	8.71
73	9.17	9.27	8.57	9
73	8.17	8.2	2.83	6.4
74	6.87	8.73	8.93	8.18
75	8.9	7.8	8.97	8.56
75	8.47	9.47	7.7	8.54
76	2.9	2.57	3	2.82
78	3.47	3.33	3.47	3.42
78	3.2	3.13	3.33	3.22
78	8.2	7.93	8.83	8.32
78	2.53	2.97	3.17	2.89
79	9	8.63	8.57	8.73
79	3.07	3.13	3.67	3.29
80	2.93	3.2	3.37	3.17
82	3.47	3.5	3.37	3.44
82	2.9	2.9	3.33	3.04
82	3.13	2.83	3.57	3.18
83	3.37	3.3	3.4	3.36
84	3	2.3	3.5	2.93
84	3.23	3.2	3.67	3.37
84	3.6	3.5	3.1	3.4
84	3.37	3.17	2.97	3.17
86	3.83	3.33	3.57	3.58
86	2.83	2.53	3.6	2.99
88	3.43	3.47	3.67	3.52
89	3.4	2.4	3.1	2.97
90	3.43	3.03	3.67	3.38
92	3.5	3.53	3.23	3.42
92	2.53	2.43	2.6	2.52
93	9.43	8.8	9.1	9.11

## Sheet: Creep
Age	Proximal	Middle	Distal	Average
40	1.16	1.34	1.21	1.24
48	1.17	1.28	1.18	1.21
51	1.04	1.14	0.91	1.03
51	0.92	1.04	1.18	1.05
53	0.19	0.81	1.25	0.75
56	1.29	1.27	0.99	1.18
59	1.05	1.34	1.38	1.26
60	1.39	1.26	1.03	1.23
61	0.87	1.12	0.89	0.96
61	1.47	1.21	1.29	1.33
61	1.31	1.39	1.16	1.29
63	1.03	1.25	0.85	1.05
66	0.74	0.92	1.18	0.94
66	1.22	1.31	1.13	1.22
68	1.16	0.96	1.13	1.08
68	1.01	1.32	1.33	1.22
69	0.91	0.64	0.84	0.8
69	1.31	1.26	1.09	1.22
71	1.13	1.23	1.15	1.17
71	0.91	1.05	1.2	1.06
73	1.04	1.11	1	1.05
73	1.08	1.29	1.2	1.19
73	0.94	3.8	0.97	1.91
74	0.31	0.38	0.83	0.51
75	1.02	1.19	1.06	1.09
75	0.18	1.5	1.28	0.99
76	0.37	0.48	0.47	0.44
78	0.45	0.46	0.41	0.44
78	0.4	0.4	0.36	0.38
78	0.39	0.42	0.45	0.42
78	0.49	0.45	0.4	0.45
79	0.47	0.44	0.44	0.45
79	0.49	0.36	0.43	0.43
80	0.46	0.41	0.47	0.45
82	0.46	0.43	0.39	0.43
82	0.44	0.46	0.44	0.45
82	0.46	0.39	0.47	0.44
83	0.46	0.4	0.42	0.43
84	0.45	0.45	0.42	0.44
84	0.48	0.41	0.43	0.44
84	0.37	0.42	0.41	0.4
84	0.4	0.47	0.45	0.44
86	0.48	0.41	0.47	0.45
86	0.49	0.44	0.39	0.44
88	0.46	0.41	0.47	0.45
89	0.43	0.44	0.48	0.45
90	0.38	0.38	0.43	0.39
92	0.44	0.42	0.44	0.43
92	0.44	0.42	0.42	0.42
93	0.41	0.41	0.43	0.41
40	1.06	1.3	1.06	1.14
48	1.16	1.07	1.03	1.09
51	1.03	1.32	0.74	1.03
51	0.9	1.05	0.84	0.93
53	0.77	0.82	1.21	0.93
56	1.24	1.23	1.2	1.23
59	0.9	1.24	1.29	1.14
60	0.97	1.06	1.27	1.1
61	1.18	1.25	1.05	1.16
61	0.46	0.42	0.44	0.44
61	1.19	1.11	0.96	1.09
63	1.29	1.21	0.86	1.12
66	1.2	1.07	0.95	1.07
66	0.41	0.44	0.42	0.42
68	1.25	0.63	1.24	1.04
68	1.02	1.16	1	1.06
69	1.19	0.9	1.05	1.05
69	0.43	1.01	0.23	0.56
71	1.08	0.9	1.16	1.05
71	0.21	0.97	1.06	0.74
73	1.25	1.34	1.08	1.23
73	1	1.16	1.19	1.12
73	0.97	0.95	0.2	0.71
74	0.65	1.16	1.19	1
75	1.16	0.92	1.22	1.1
75	1.02	1.28	0.92	1.08
76	0.41	0.38	0.42	0.4
78	0.47	0.44	0.46	0.46
78	0.43	0.44	0.46	0.44
78	0.37	0.42	0.44	0.41
78	0.99	0.95	1.16	1.03
79	0.44	0.44	0.48	0.45
79	1.21	1.09	1.1	1.13
80	0.42	0.44	0.45	0.44
82	0.46	0.47	0.45	0.46
82	0.48	0.4	0.47	0.45
82	0.41	0.43	0.44	0.43
83	0.46	0.45	0.46	0.46
84	0.42	0.37	0.51	0.44
84	0.45	0.46	0.42	0.44
84	0.46	0.44	0.43	0.44
84	0.42	0.43	0.36	0.41
86	0.51	0.45	0.47	0.48
86	0.41	0.39	0.48	0.42
88	0.51	0.52	0.48	0.5
89	0.51	0.4	0.43	0.45
90	0.46	0.43	0.48	0.46
92	0.46	0.48	0.43	0.46
92	0.37	0.37	0.39	0.38
93	1.27	1.11	1.19	1.19

## Sheet: Fibroblast
≥ 80 years old	< 60 years old
27	16
22	18
23	11
22	17
30	20
28	12
22	18
20	20
15	15
19	14
28	10
28	15
27	10
17	11
26	16
29	20
25	14
16	10
27	9
25	8
26	10
22	9
20	12
7	3
9	10
9	9
10	11
18	13
19	10
20	9
14	9
12	7
12	9
17	8
21	11
15	8
19	9
10	4
13	7
17	8
10	9
18	9
20	6
12	16
20	11
16	7
18	8
13	6
11	4
19	5
22	13
15	7
11	9
13	6
19	11
16	8
22	10
10	7
14	9
18	20
